# Supplementary material for: SARS-CoV-2 genome variants epidemiology surveillance in Ethiopia and dynamic mutational changes of structural S Spike protein through computational analysis
Source: Research Square preprint supplement (doi:10.21203/rs.3.rs-700282/v1), 2021-07-12
Supplement: Supplementary file 1 [file dc411a09dadbec460708acdb.docx]

**Supplementary Data**

**Table S1. Ethiopian complete genome of SARS CoV-2 and S of spike amino acid changes with GISAID metadata of all patients**

| ***Location*** | ***Genome length (nt)*** | ***Accession ID*** | ***Variants*** | ***Collection Date*** | ***Clade*** | ***Host*** | ***Gender*** | ***Age*** | ***Patient status*** | ***Sample*** | ***Amino Acid (aa) Variation*** | |
| --- | --- | --- | --- | --- | --- | --- | --- | --- | --- | --- | --- | --- |
| *Ethiopia* | 29,857 | | EPI_ISL_1169919 | | --- | |  | | | None | | --- | | 2021-01-13 | O | Human | Female | 41 | Suspected | Nasopharyngeal swab | Spike M1229I, Spike N501Y, N D377Y, N S194L, NS3 Q57H, NS8 W45C, NSP2 L24F, NSP3 S269A, NSP3 V521I, NSP5 S284G, NSP12 L648F, NSP12 P323L, NSP13 I304J, NSP13 Y277C |
| *Ethiopia* | 29,861 | EPI_ISL_1170958 | None | 2020-11-16 | O | Human | Male | 31 | Unknown | - | Spike K1073N, N P199L, NS3 Q57H, NS3 T32I, NS3 T223I, NSP2 F499L, NSP4 M458I, NSP12 P323F |
| *Ethiopia* | 29,861 | EPI_ISL_1170957 | None | 2020-11-15 | O | Human | Male | 42 | Unknown | Nasopharyngeal swab | M H210P, N P199L, NS3 Q57H, NS3 S171L, NSP2 F499L, NSP3 K1382N, NSP3 P985S, NSP12 P323L, NSP13 S259P |
| *Ethiopia* | 29, 859 | EPI_ISL_1170956 | None | | 2021-01-12 | | --- | |  | | O | Human | Male | 41 | Community surveillance | Nasopharyngeal swab | Spike A1078S, Spike M1229I, N S194L, NS3 Q57H, NSP2 L24F, NSP5 N133B, NSP6 V149F, NSP7 L71F, NSP12 P323L, NSP13 S38L, NSP15 T33I |
| *Ethiopia* | 29,878 | EPI_ISL_1899485 | None | 2021-01-27 | GH | Human | Male | 26 | Unknown | - | Spike D614G, Spike G142A, Spike M1229I, Spike T1006I, N S194L, NS3 Q57H, NS8 E59stop, NSP2 L24F, NSP2 M117V, NSP5 S284G, NSP12 E919D, NSP12 P323L, NSP13 L297F |
| *Ethiopia* | 29,877 | EPI_ISL_1899281 | VUI202012/01 GRY (B.1.1.7) | 2021-01-23 | GR | Human | female | 52 | Unknown |  | Spike A570D, Spike D614G, Spike D1118H, Spike N501Y, Spike P681H, Spike S982A, Spike T716I, N D3L, N G204R, N R203K, N S235F, NS3 T89I, NS8 K68stop, NS8 Q27stop, NS8 R52I, NS8 Y73C, NSP3 A890D, NSP3 I1412T, NSP3 T183I, NSP12 P227L, NSP12 P323L, NSP14 P451S |
| *Ethiopia* | 29,874 | EPI_ISL_1899047 | VUI202012/01 GRY (B.1.1.7) | 2021-02-04 | GR | Human | female | 18 | unknown | - | Spike A570D, Spike D614G, Spike D1118H, Spike N501Y, Spike P330L, Spike P681H, Spike S982A, Spike T716I, Spike Y144del, N D3L, N G204R, N R203K, N S235F, NS3 T89I, NS8 K68stop, NS8 Q27stop, NS8 R52I, NS8 Y73C, NSP2 A510V, NSP3 A890D, NSP3 I1412T, NSP3 T183I, NSP12 P227L, NSP12 P323L, NSP14 P451S |
| *Ethiopia* | 29,878 | EPI_ISL_1898814 |  | 2021-01-23 | GH | Human | male | 18 | Unknown |  | Spike A520S, Spike D614G, N P199L, NS3 A110S, NS3 Q57H, NS3 S171L, NSP2 F499L, NSP5 K90R, NSP12 P323L |
| *Ethiopia* | 29,878 | EPI_ISL_1898554 |  | 2021-02-01 | GH | Human | female | 34 | Unknown |  | Spike A771S, Spike D614G, Spike S939F, N P199L, NS3 Q57H, NS3 S171L, NSP2 C487S, NSP2 F499L, NSP3 D163G, NSP3 R352H, NSP12 P323L |
| *Ethiopia* | 29,871 | EPI_ISL_1898258 |  | 2021-01-23 | GH | Human | Male | 15 | unknown | - | Spike D614G, Spike N440K, Spike S13T, N P199L, NS3 Q57H, NS3 S171L, NSP2 F499L, NSP12 P323L |
| *Ethiopia* | 29,877 | EPI_ISL_1897884 | VUI202012/01 GRY (B.1.1.7) |  | GR | human | female | 14 | Unknown |  | Spike A570D, Spike D614G, Spike D1118H, Spike N501Y, Spike P681H, Spike S982A, Spike T716I, N D3L, N G204R, N R203K, N S235F, NS3 V163L, NS8 Q27stop, NS8 R52I, NS8 Y73C, NSP1 E2K, NSP3 A890D, NSP3 G307C, NSP3 I1412T, NSP3 P141S, NSP3 T183I, NSP10 T12I, NSP12 P323L |
| *Ethiopia* | 29.878 | EPI_ISL_1897648 |  | 2021-01-26 | GH | Human | female | 26 | unknown |  | Spike D614G, N P199L, NS3 Q57H, NSP2 E264K, NSP2 F499L, NSP12 P323L, NSP12 T26I, NSP13 E341D |
| *Ethiopia* | 29,878 | EPI_ISL_1897646 |  | 2021-01-26 | GH | Human | Male | 18 | unknown | Swap | Spike D614G, Spike E180Q, Spike E309Q, Spike M1229I, Spike N501Y, N D377Y, N S194L, NS3 Q57H, NSP2 L24F, NSP3 K1182R, NSP3 S769L, NSP3 V521I, NSP5 S284G, NSP6 A186T, NSP12 L648F, NSP12 P323L, NSP13 P82S, NSP13 Y277C |
| *Ethiopia* | 29,878 | EPI_ISL_1897644 |  | 2021-02-03 | GH | Human | female | 28 | Unknown |  | Spike D614G, Spike E180Q, Spike M1229I, Spike N501Y, N D377Y, N S194L, NS3 Q57H, NSP2 A31V, NSP2 L24F, NSP3 G1001S, NSP3 T350I, NSP3 V521I, NSP5 S284G, NSP12 L648F, NSP12 P323L, NSP13 T588A, NSP13 Y277C, NSP15 K70R |
